# Supplementary material for: Men and Women as Differential Social Barometers: Gender Effects of Perceived Friend Support on the Neuroticism-Loneliness-Well-Being Relationship in a Younger Adult Population
Source: MDPI journal article supplement (doi:10.3390/ijerph19137986), 2022-06-29
Supplement: s1 [file s1]

## Supplementary Materials

|                  |                                                                                                                                                                                |          |
|------------------|--------------------------------------------------------------------------------------------------------------------------------------------------------------------------------|----------|
| <b>Table S1</b>  | Pairwise contrasts between conditional indirect effects for Neuroticism-Loneliness-Impact of Well-being mediation model with Perceived friend support and Gender as moderators | Page 2   |
| <b>Table S2</b>  | Conditional indirect effects of neuroticism on well-being impact via loneliness at levels of perceived friend support and gender                                               | Page 3   |
| <b>Table S3</b>  | Conditional Effects (Mean, $\pm$ 1SD) on loneliness of Neuroticism at Values of the Moderators                                                                                 | Page 3   |
| <b>Table S4</b>  | Conditional Effects (Mean, $\pm$ 1SD) on well-being impact of Neuroticism at Values of the Moderators                                                                          | Page 4   |
| <b>Figure S1</b> | Path Coefficients for Simple Mediation Analysis with Loneliness as a Mediator of Personality on Self-Reported Health                                                           | Page 5   |
| <b>Figure S2</b> | Full statistical model for mediation of neuroticism on well-being impact via loneliness with perceived friend support and gender as moderators                                 | Page 6–7 |

**Table S1**

Pairwise contrasts between conditional indirect effects for Neuroticism-Loneliness-Impact of Well-being mediation model with Perceived friend support and Gender as moderators.

| Effect 1 | Effect 2 | Contrast (se) | 95% Bootstrap CI |
|----------|----------|---------------|------------------|
| 0.121    | -0.002   | 0.122         | [-0.273, 0.569]  |
| 0.049    | -0.002   | 0.051         | [-0.091, 0.215]  |
| 0.351    | -0.002   | 0.353         | [-0.007, 0.773]  |
| 0.093    | -0.002   | 0.095         | [-0.171, 0.408]  |
| 0.664    | -0.002   | 0.666         | [0.084, 1.249]   |
| 0.049    | 0.121    | -0.072        | [-0.481, 0.302]  |
| 0.351    | 0.121    | 0.230         | [-0.026, 0.481]  |
| 0.093    | 0.121    | -0.027        | [-0.458, 0.375]  |
| 0.664    | 0.121    | 0.544         | [-0.100, 1.146]  |
| 0.351    | 0.049    | 0.302         | [-0.042, 0.685]  |
| 0.093    | 0.049    | 0.044         | [-0.080, 0.200]  |
| 0.664    | 0.049    | 0.615         | [0.051, 1.174]   |
| 0.093    | 0.351    | -0.257        | [-0.660, 0.114]  |
| 0.664    | 0.351    | 0.313         | [-0.077, 0.676]  |
| 0.664    | 0.093    | 0.571         | [-0.012, 1.150]  |

Note. Contrast = Effect 1 minus effect 2

CI = confidence interval.

Values show adjusted results with age, education level and isolation status included as covariates.

**Table S2**

Conditional indirect effects of neuroticism on well-being impact via loneliness at levels of perceived friend support and gender

| Perceived friend support | Gender | <i>b</i> coefficient | Boot se | 95% Bootstrap CI |
|--------------------------|--------|----------------------|---------|------------------|
| −1.410                   | Women  | −0.002               | 0.129   | [−0.286, 0.231]  |
| −1.410                   | Men    | 0.121                | 0.167   | [−0.195, 0.450]  |
| 0.00                     | Women  | 0.049                | 0.109   | [−0.175, 0.253]  |
| 0.00                     | Men    | 0.351                | 0.150   | [0.063, 0.651]   |
| 1.410                    | Women  | 0.093                | 0.132   | [−0.174, 0.356]  |
| 1.410                    | Men    | 0.664                | 0.271   | [0.136, 1.194]   |

Note. Low, mean and high levels of perceived support are shown as 1SD below the mean, mean and +1SD above the mean.

CI = confidence interval.

Values show adjusted results with age, education level and isolation status included as covariates.

**Table S3**

Conditional Effects (Mean,  $\pm$  1SD) on loneliness of Neuroticism at Values of the Moderators

| Moderator values |        | <i>b</i> | <i>se</i> | <i>t</i> | <i>p</i> | 95% <i>CI</i> |       |
|------------------|--------|----------|-----------|----------|----------|---------------|-------|
| Support friends  | Gender |          |           |          |          | LL            | UL    |
| −1.410           | Women  | 0.649    | 0.069     | 9.431    | <0.001   | 0.514         | 0.785 |
| −1.410           | Men    | 0.470    | 0.083     | 5.653    | <0.001   | 0.307         | 0.634 |
| 0.00             | Women  | 0.611    | 0.049     | 12.346   | <0.001   | 0.514         | 0.708 |
| 0.00             | Men    | 0.595    | 0.068     | 8.758    | <0.001   | 0.462         | 0.729 |
| 1.410            | Women  | 0.572    | 0.066     | 8.667    | <0.001   | 0.442         | 0.702 |
| 1.410            | Men    | 0.720    | 0.094     | 7.667    | <0.001   | 0.536         | 0.905 |

Note: Gender values assigned as women = 0; men = 1.

Values show adjusted results when age, education level and isolation status are included as covariates.

**Table S4**Conditional Effects (Mean,  $\pm$  1SD) on well-being impact of Neuroticism at Values of the Moderators

| Moderator values |        | b      | se    | t      | p      | 95% <i>CI</i> |       |
|------------------|--------|--------|-------|--------|--------|---------------|-------|
| Support friends  | Gender |        |       |        |        | LL            | UL    |
| -1.410           | Women  | 0.742  | 0.247 | 3.007  | =0.003 | 0.257         | 1.226 |
| -1.410           | Men    | 1.059  | 0.297 | 3.564  | <0.001 | 0.475         | 1.643 |
| 0.00             | Women  | 1.045  | 0.183 | 5.719  | <0.001 | 0.686         | 1.403 |
| 0.00             | Men    | 0.476  | 0.250 | 1.907  | =0.057 | -0.014        | 0.967 |
| 1.410            | Women  | 1.348  | 0.242 | 5.568  | <0.001 | 0.782         | 1.823 |
| 1.410            | Men    | -0.106 | 0.388 | -0.274 | =0.784 | -0.870        | 0.657 |

Note: Gender values assigned as women = 0; men = 1.

Values show adjusted results when age, education level and isolation status are included as covariates.

**Figure S1.** Path Coefficients for Simple Mediation Analysis with Loneliness as a Mediator of Personality on Self-Reported Health

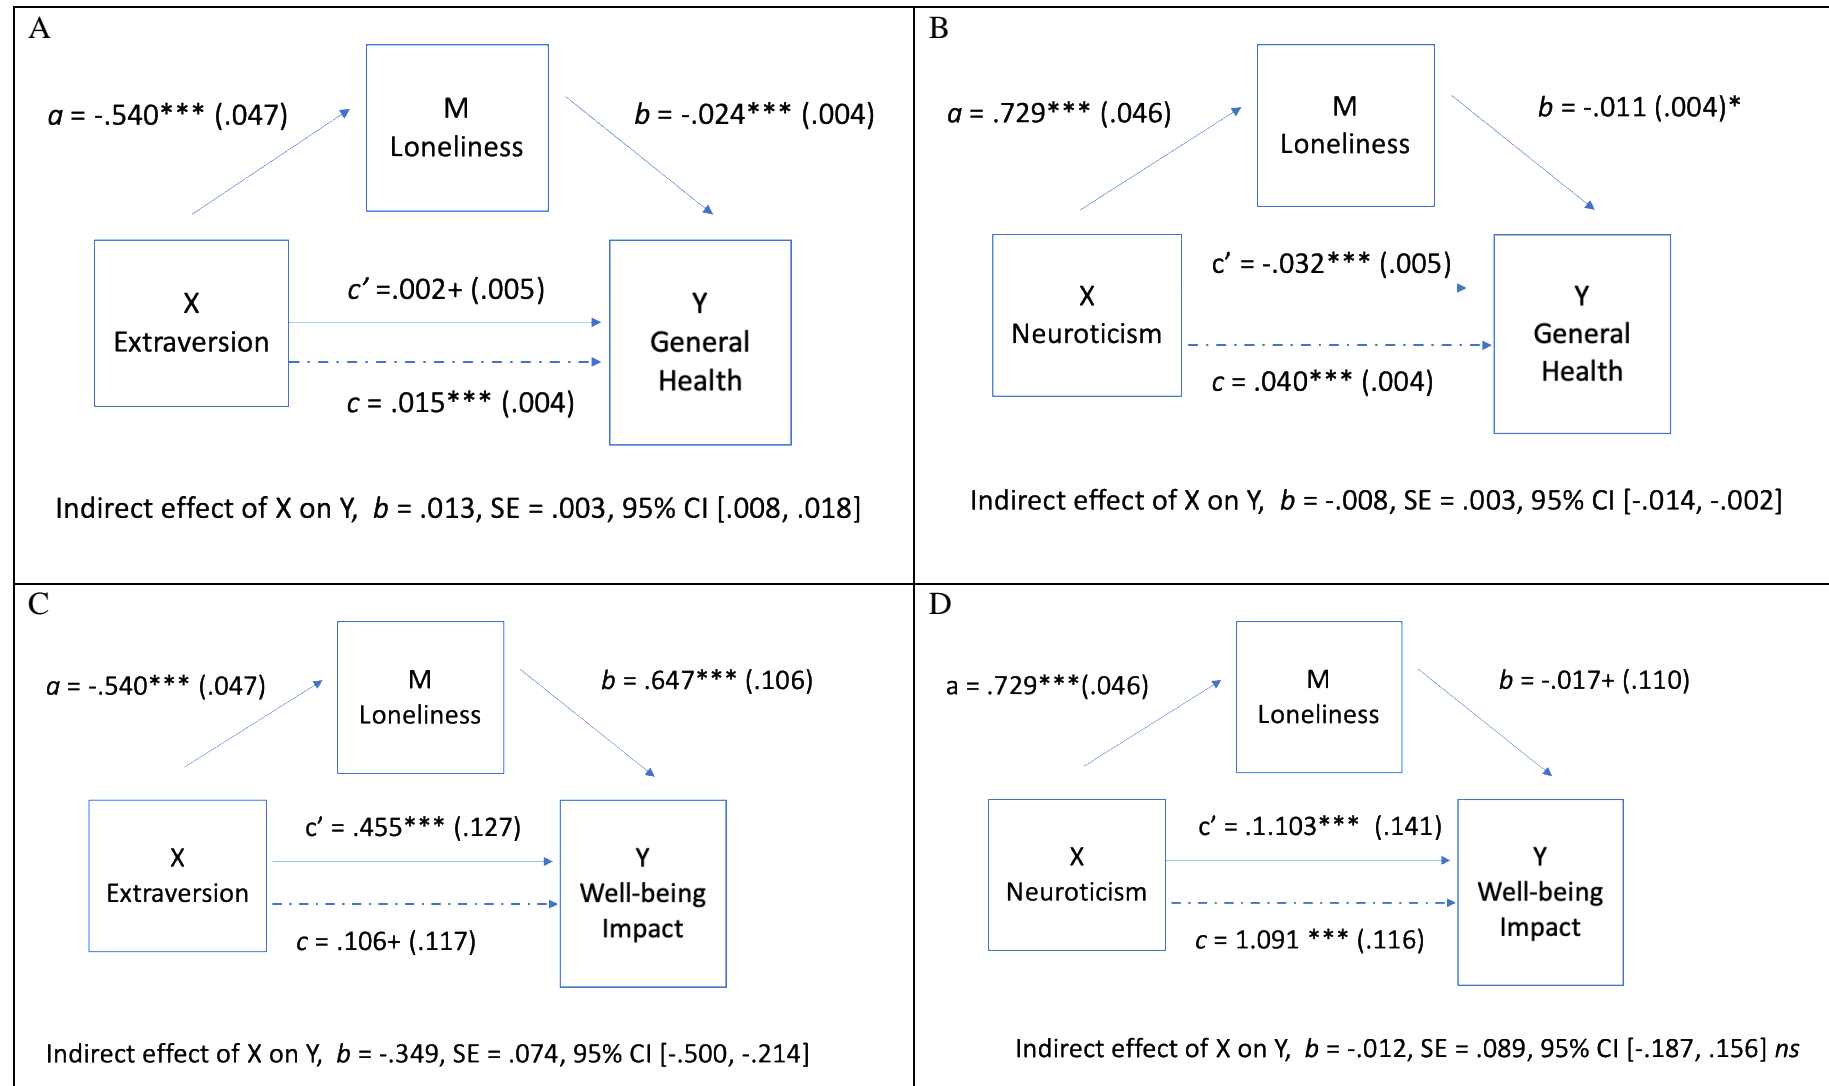

Note: Adjusted models shown with covariates of age, education level and isolation status

**Figure S2**

Full statistical model for mediation of neuroticism on well-being impact via loneliness with perceived friend support and gender as moderators

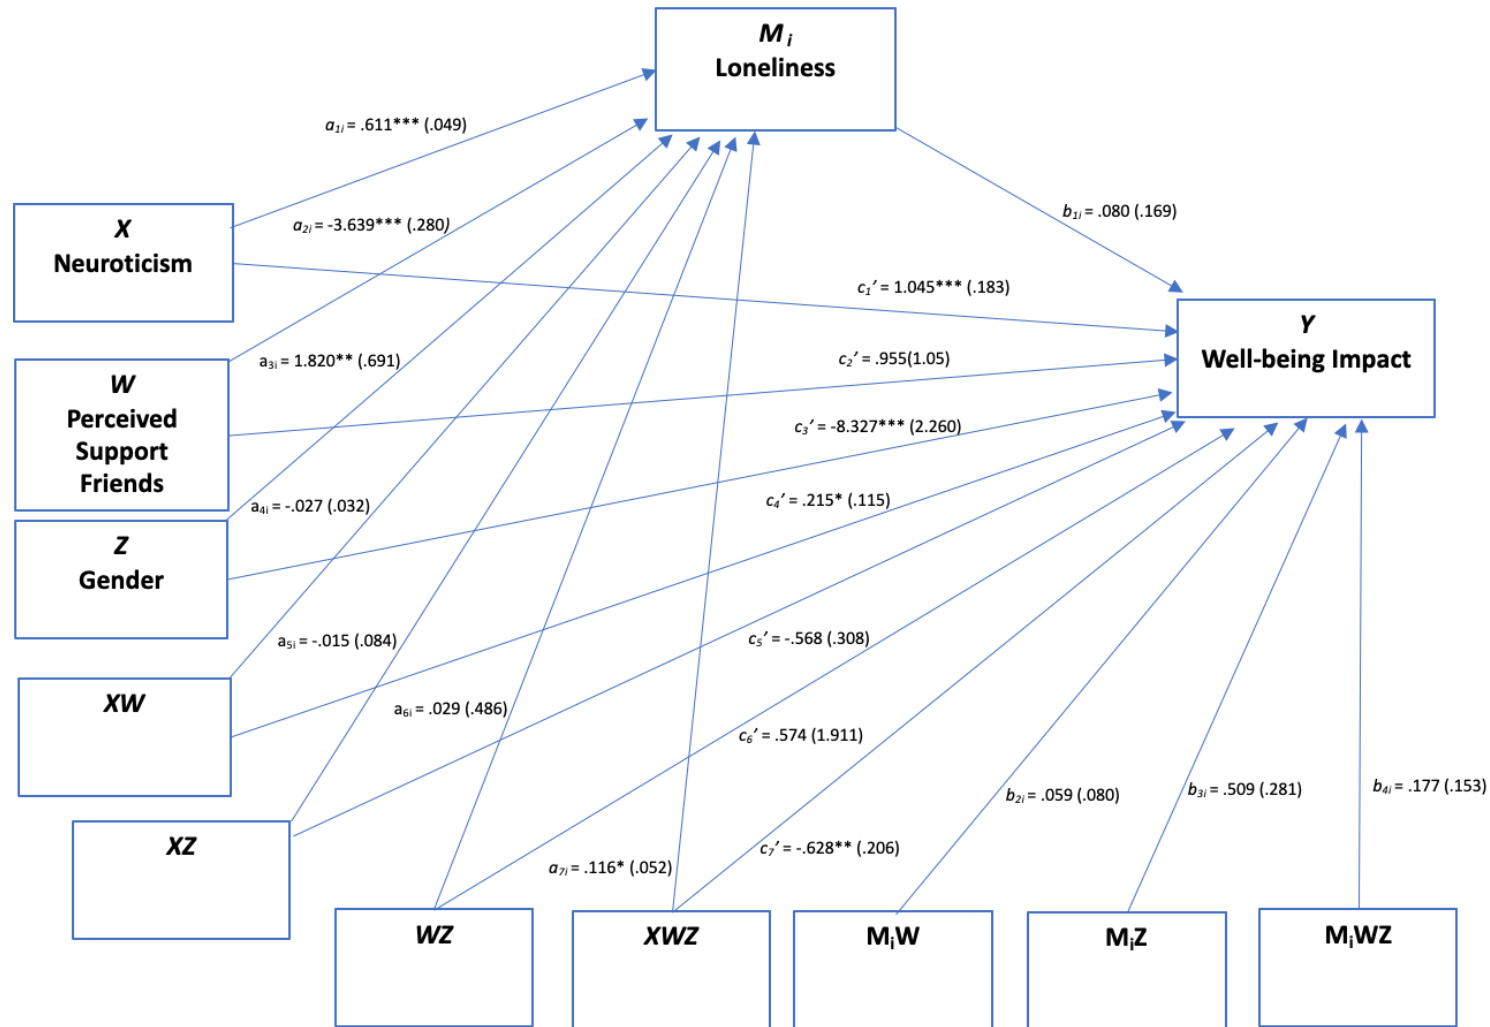

*Note.* Values show adjusted b coefficient (se) when age, education level and isolation status are included as covariates.

Covariate main effects with loneliness: age, education level, isolation, all ns; well-being impact: age, ns; education level,  $p = 0.01$ ; isolation status,  $p = 0.046$

\*  $p \leq 0.05$ , \*\*  $p < 0.01$ , \*\*\*  $p < 0.001$
